# Supplementary material
Source: PubMed Central journal article supplement (PMC4422767)
Supplement: NIHMS681165-supplement-Supplementary.pdf [file NIHMS681165-supplement-Supplementary.pdf]

|                                             | Pre-GBP   | 1 Month Post-GBP | 2 Year Post-GBP |
|---------------------------------------------|-----------|------------------|-----------------|
| Total                                       | 4.34±3.62 | 3.21±2.38        | 6.26±5.78       |
| Primary                                     | 2.88±3.34 | 1.95±1.71        | 4.06±4.49       |
| Secondary                                   | 1.46±0.60 | 1.26±0.76        | 2.20±1.40       |
| Conjugated                                  | 3.16±3.83 | 2.62±2.41        | 4.12±5.29       |
| Unconjugated                                | 1.18±0.52 | 0.59±0.29*       | 2.13±3.06†      |
| Glycine-conjugated                          | 2.87±3.54 | 2.23±2.09        | 3.65±4.77       |
| Taurine-conjugated                          | 0.29±0.29 | 0.39±0.34        | 0.48±0.56       |
| Primary conjugated                          | 2.30±3.40 | 1.70±1.69        | 2.86±4.86       |
| Primary unconjugated                        | 0.58±0.37 | 0.25±0.29*       | 1.21±2.37†      |
| Secondary conjugated                        | 0.86±0.54 | 0.92±0.74        | 1.27±1.26       |
| Secondary unconjugated                      | 0.60±0.34 | 0.34±0.19*       | 0.93±0.76†      |
| 12 $\alpha$ -OH                             | 1.42±1.05 | 1.25±0.98        | 2.78±2.16       |
| Non12 $\alpha$ -OH                          | 2.91±2.73 | 1.97±1.44        | 3.48±3.90       |
| Primary:Secondary (Ratio)                   | 2.10±2.01 | 1.69±1.77        | 1.54±0.73       |
| Conjugated:Unconjugated (Ratio)             | 4.25±7.50 | 5.53±6.23        | 3.94±4.81       |
| 12 $\alpha$ -OH:Non 12 $\alpha$ -OH (Ratio) | 0.58±0.28 | 0.64±0.21        | 0.95±0.37*†     |
| CA                                          | 0.12±0.08 | 0.07±0.05        | 0.46±1.08       |
| GCA                                         | 0.48±0.85 | 0.37±0.40        | 0.65±0.91       |
| CDCA                                        | 0.46±0.27 | 0.18±0.24*       | 0.74±1.30†      |
| GCDCA                                       | 1.74±3.00 | 1.21±1.20        | 2.06±3.09       |
| TCDC                                        | 0.08±0.03 | 0.12±0.10        | 0.14±0.12       |
| DCA                                         | 0.35±0.30 | 0.22±0.15        | 0.76±0.74†      |
| GDCA                                        | 0.28±0.31 | 0.36±0.39        | 0.60±0.51       |
| TDCA                                        | 0.19±0.34 | 0.24±0.23        | 0.30±0.47       |
| LCA                                         | 0.07±0.03 | 0.07±0.03        | 0.08±0.04       |
| GLCA                                        | 0.08±0.03 | 0.09±0.01        | 0.09±0.04       |
| TLCA                                        | 0.03±0.01 | 0.03±0.01        | 0.03±0.01       |
| UDCA                                        | 0.17±0.11 | 0.05±0.04*       | 0.09±0.09       |
| GUDCA                                       | 0.28±0.18 | 0.21±0.18        | 0.24±0.53       |

**Supplementary Table 1.** Fasting composite and individual plasma bile acids.

Data are mean±SD. All bile acids are presented in concentrations of  $\mu$ M.

\* P < 0.05 vs. Pre-GBP, †P < 0.05 vs. 1 month Post-GBP.

CA, Cholic Acid; CDCA, Chenodeoxycholic acid; DCA, Deoxycholic acid; LCA, Lithocholic acid; UDCA, Ursodeoxycholic acid. G- or T- indicates glycine or taurine conjugation.

|                     | $\Delta$ 30 MINUTES |          |         | $\Delta$ AUC (0-60MIN) |             |         |
|---------------------|---------------------|----------|---------|------------------------|-------------|---------|
|                     | 1 month             | 2 years  | P value | 1 month                | 2 years     | P value |
| Total               | 0.5±5.1             | 6.2±11.7 | .07     | -10.2±224.3            | 207.6±448.7 | .07     |
| Primary             | 0.03±3.3            | 3.9±7.9  | .07     | -25.1±163.2            | 125.5±323.0 | .08     |
| Secondary           | 0.5±2.1             | 2.3±4.2  | .08     | 14.9±86.8              | 82.1±153.5  | .08     |
| Conjugated          | -0.2±2.1            | 1.4±4.9  | NS      | -13.8±78.4             | 71.6±251.7  | NS      |
| Unconjugated        | 0.7±4.9             | 4.8±11.2 | NS      | 3.6±230.6              | 136.0±425.3 | NS      |
| Glycine-conjugated  | 0.3±3.9             | 4.1±9.4  | NS      | -11.9±197.3            | 116.1±363.5 | NS      |
| Taurine-conjugated  | 0.4±1.0             | 0.6±1.8  | NS      | 15.4±40.8              | 19.9±65.7   | NS      |
| 12 $\alpha$ -OH     | 0.8±2.5             | 4.0±5.8  | <.05    | 25.0±100.8             | 152.1±219.2 | <.05    |
| Non 12 $\alpha$ -OH | -0.3±2.8            | 2.2±6.4  | NS      | -35.2±140.7            | 55.5±258.8  | NS      |

**Supplementary Table 2.** Change in postprandial composite plasma bile acid levels 1 month and 2 years after surgery.

Data are mean±SD. All bile acids are presented in concentrations of  $\mu$ M.

|                     | Pre-Surgery | 1 month     | 2 years      |
|---------------------|-------------|-------------|--------------|
| Total               | 818.8±391.2 | 735.5±322.5 | 1105.3±879.4 |
| Primary             | 527.4±337.8 | 424.2±190.6 | 689.3±646.8  |
| Secondary           | 291.4±115.3 | 311.2±154.9 | 416.0±256.7  |
| Conjugated          | 593.5±395.5 | 526.4±274.2 | 742.8±595.7  |
| Unconjugated        | 225.3±96.2  | 209.0±140.5 | 362.5±525.7  |
| Glycine-conjugated  | 533.5±368.8 | 443.4±231   | 655.3±506.6  |
| Taurine-conjugated  | 60.0±33.6   | 83.1±55.8   | 87.5±101.4   |
| 12 $\alpha$ -OH     | 295.7±166.0 | 318.7±170.8 | 545.5±463.6  |
| Non 12 $\alpha$ -OH | 523.1±265.2 | 416.7±161.3 | 559.8±448.1  |

**Supplementary Table 3.** Postprandial composite plasma bile acid levels (180 min AUC) 1 month and 2 years after surgery.

Data are mean±SD. All bile acids are presented in concentrations of  $\mu$ M.

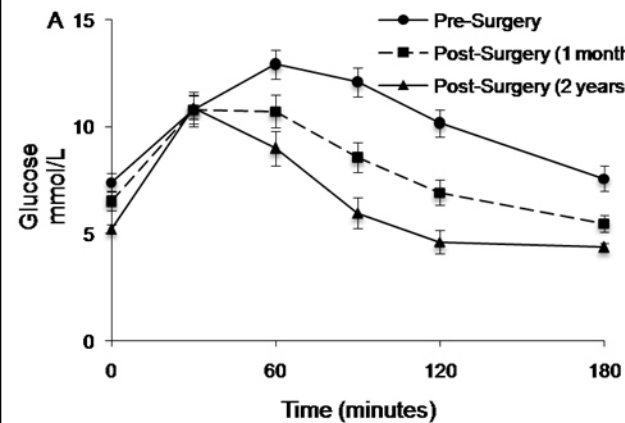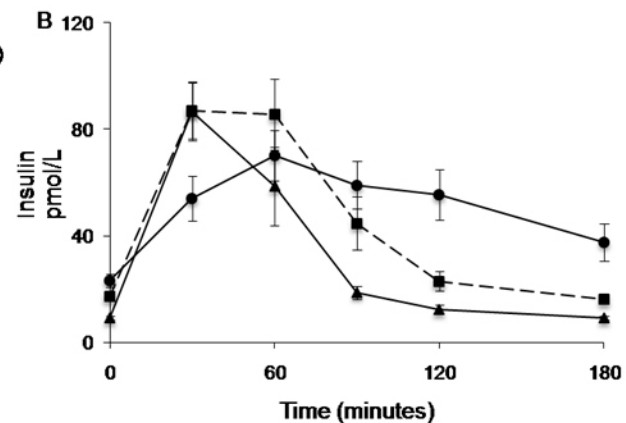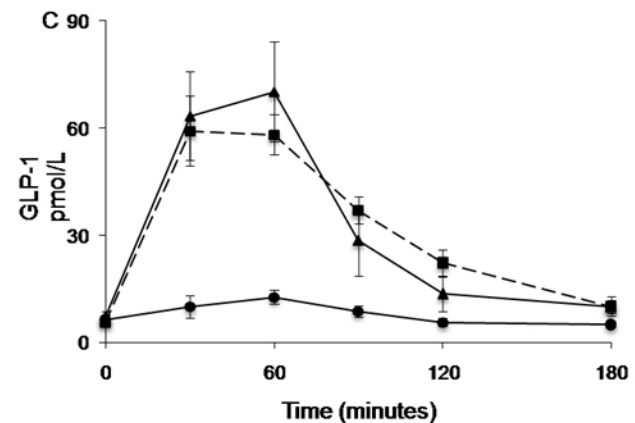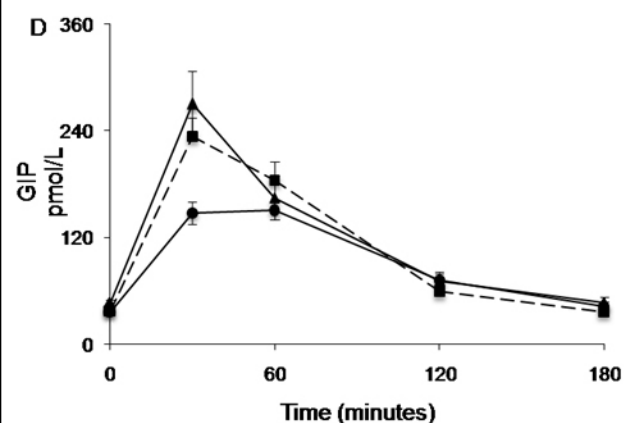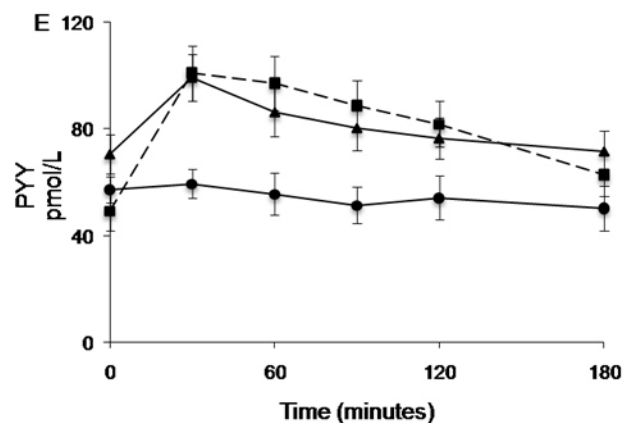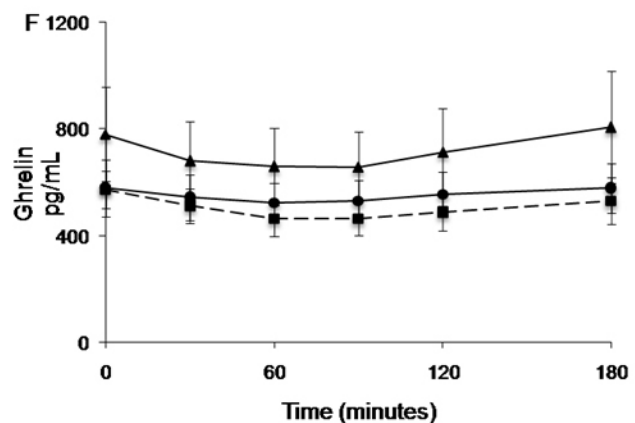

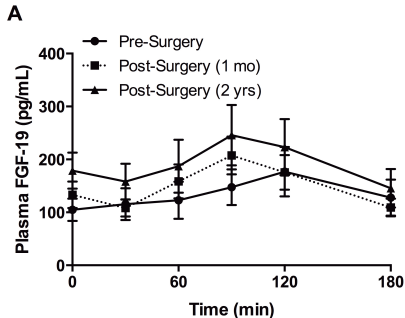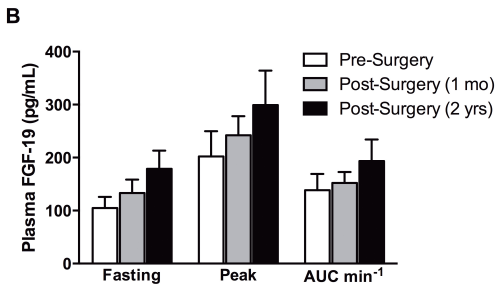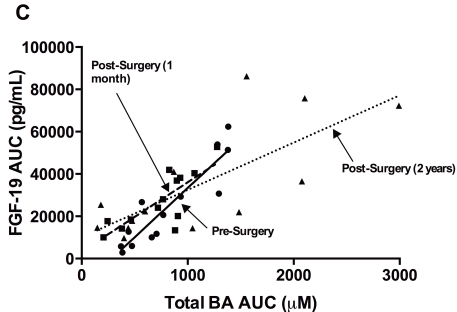

**SUPPLEMENTARY FIGURE 1. Effect of GBP on glucose, insulin and gut hormone levels.**

(A) Glucose AUC was significantly lower 1 month and 2 years post-surgery vs. pre-surgery ( $p < .05$ ). (B) Insulin AUC was significantly lower 2 years post-surgery vs. pre-surgery ( $p < .05$ ). (C,E) GLP-1 and PYY AUC and peak levels were significantly higher 1 month and 2 years post-surgery vs. pre-surgery ( $p < .05$ ). (D) GIP peak but not AUC was significantly higher 1 month and 2 years post-surgery vs. pre-surgery. (F) Ghrelin AUC and nadir levels tended to be higher 2 years post-surgery vs. pre-surgery, however this did not reach significance.

**SUPPLEMENTARY FIGURE 2. Effect of GBP on circulating FGF-19 levels and the relationship between bile acids and FGF-19.**

(A-B) Fasting, peak and postprandial AUC FGF-19 levels progressively increased after GBP, however this did not reach significance. (C) During the oral glucose load, FGF-19 levels were significantly correlated with total bile acid levels ( $p < .001$ ).
